# Supplementary material
Source: PubMed Central journal article supplement (PMC6558978)
Supplement: NIHMS1026647-supplement-Supp_figS1.pdf [file NIHMS1026647-supplement-Supp_figS1.pdf]

**Hypervascularization in mTOR-dependent focal and global cortical malformations  
displays differential rapamycin-sensitivity**

Longbo Zhang, Tianxiang Huang, Shannon Teaw, and Angélique Bordey\*

Content: Supplementary figure 1

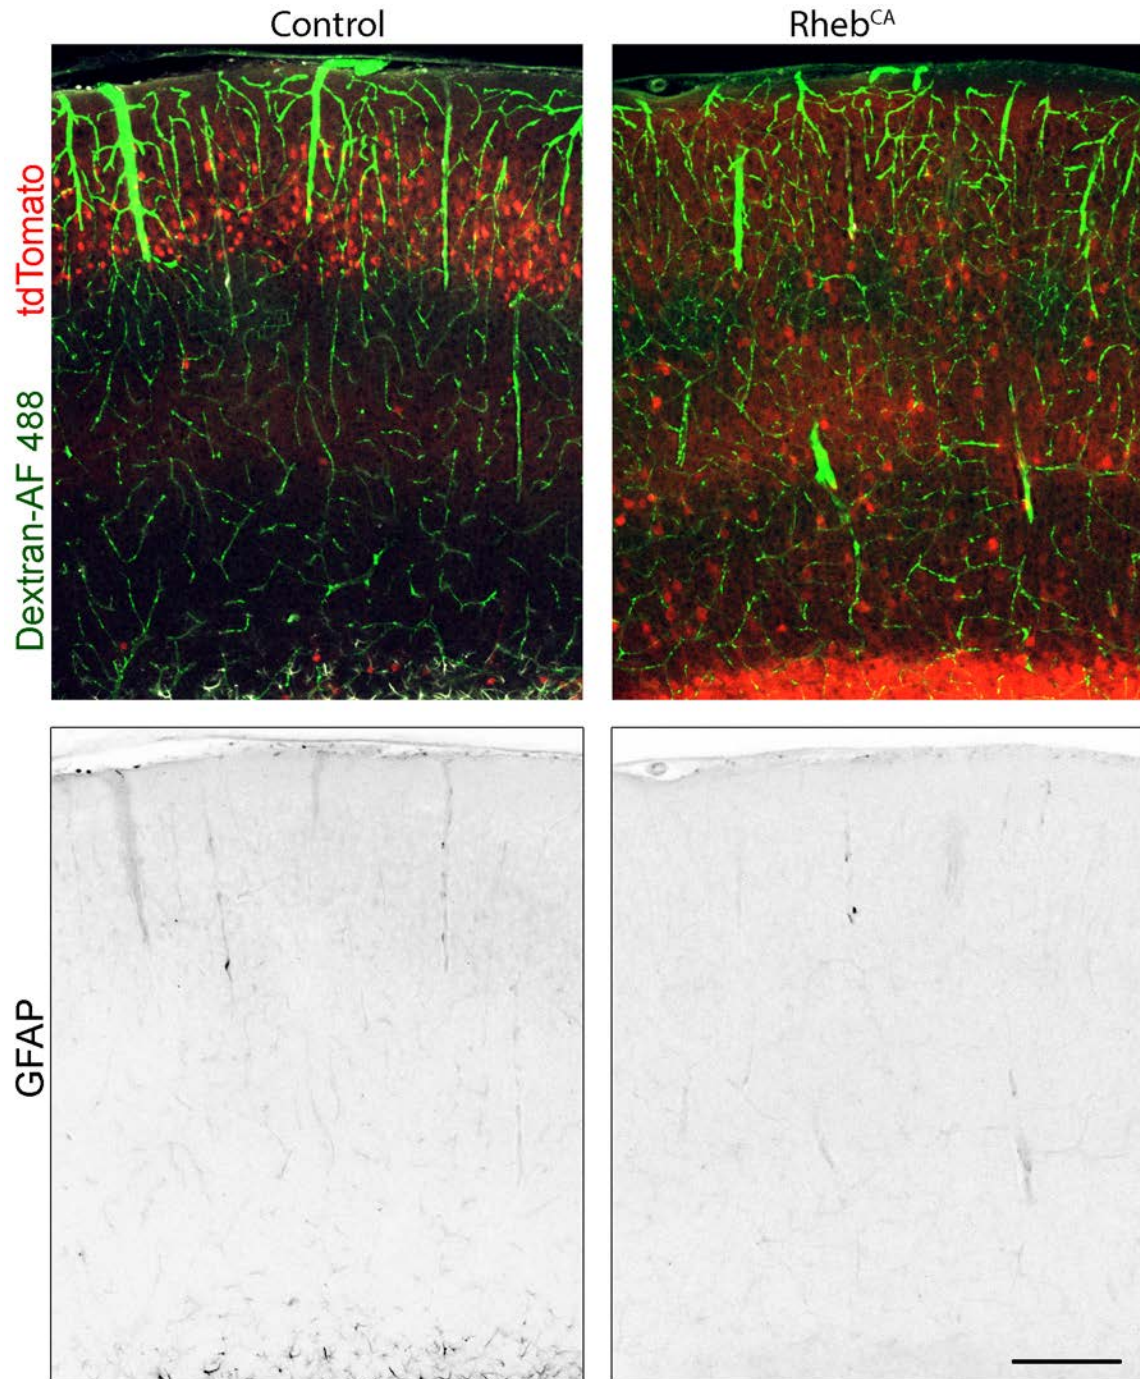

**Supplementary Figure 1:** Confocal images of Dextran-AF 488 and tdTomato fluorescence and GFAP immunostaining in coronal sections from mice electroporated with either BFP (control, A) or Rheb<sup>CA</sup> (B) in addition to tdTomato.
